# Supplementary material for: Self-assembled hierarchical mesoporous TiO2–C sub-microspheres from nanorods and their improved properties for lithium storage
Source: Royal Society of Chemistry journal article supplement (doi:10.1039/c4ra01484g), 2014-01-01
Supplement: c4ra01484g1.pdf [file c4ra01484g1.pdf]

Electronic Supplementary Information

## Self-assembled Hierarchical Mesoporous TiO<sub>2</sub>/C Sub-microspheres from Nanorods and Their Improved Properties for Lithium Storage

Zhimin Ren, Xinxin Fu, Chao Chen, Jia Wang, Chenyao Fan, Guodong Qian, and Zhiyu Wang\*

State Key Laboratory of Silicon Materials, Department of Materials Science and Engineering, Zhejiang University, Hangzhou 310027, China. Tel/Fax: +86-571-87952167; E-mail: [wangzhiyu@zju.edu.cn](mailto:wangzhiyu@zju.edu.cn).

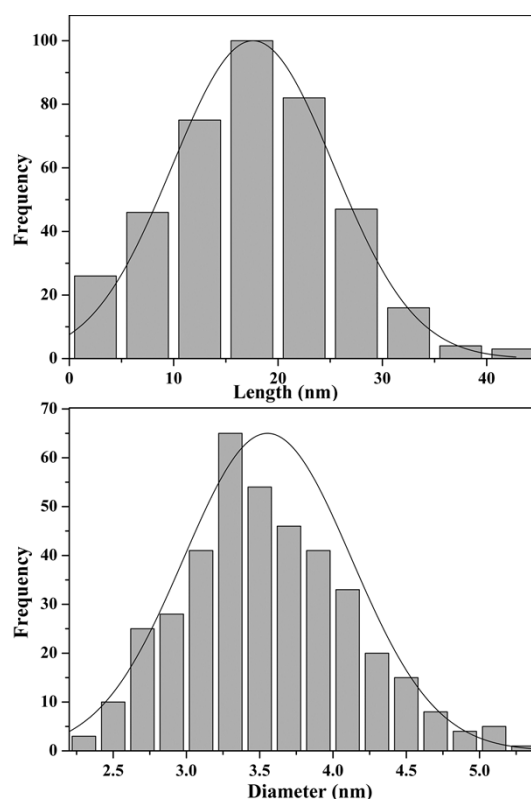

Fig. S1 The length and diameter of the as-synthesis TiO<sub>2</sub> nanorods.

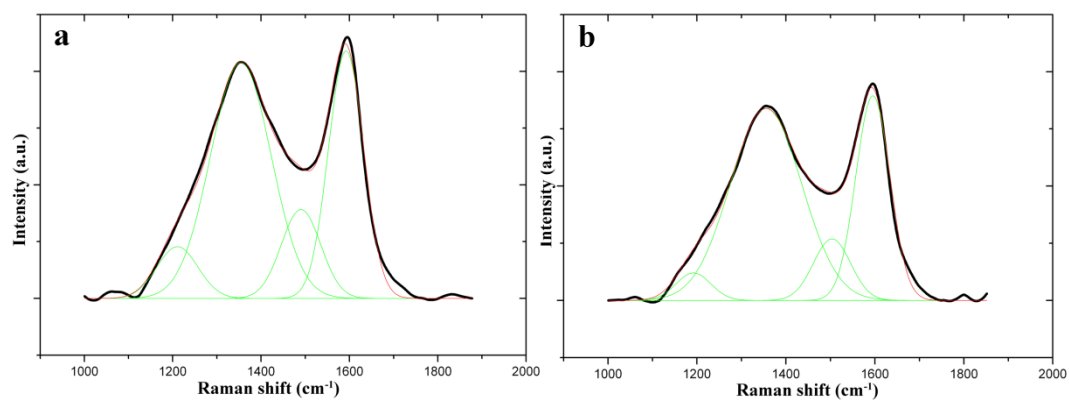

Fig. S2 Raman spectrum of: a) TiO<sub>2</sub>/C nanorods and b) TiO<sub>2</sub>/C sub-microspheres.
